# Supplementary material for: The gut hormone Allatostatin C/Somatostatin regulates food intake and metabolic homeostasis under nutrient stress
Source: Research Square preprint supplement (doi:10.21203/rs.3.rs-129041/v1), 2021-01-12
Supplement: Supplementary file 1 [file 3b714ced55f159982d1f9781.pdf]

## Reporting Summary

Nature Research wishes to improve the reproducibility of the work that we publish. This form provides structure for consistency and transparency in reporting. For further information on Nature Research policies, see our [Editorial Policies](#) and the [Editorial Policy Checklist](#).

### Statistics

For all statistical analyses, confirm that the following items are present in the figure legend, table legend, main text, or Methods section.

- |                                     |                                                                                                                                                                                                                                                                                                |
|-------------------------------------|------------------------------------------------------------------------------------------------------------------------------------------------------------------------------------------------------------------------------------------------------------------------------------------------|
| n/a                                 | Confirmed                                                                                                                                                                                                                                                                                      |
| <input type="checkbox"/>            | <input checked="" type="checkbox"/> The exact sample size ( $n$ ) for each experimental group/condition, given as a discrete number and unit of measurement                                                                                                                                    |
| <input checked="" type="checkbox"/> | <input type="checkbox"/> A statement on whether measurements were taken from distinct samples or whether the same sample was measured repeatedly                                                                                                                                               |
| <input type="checkbox"/>            | <input checked="" type="checkbox"/> The statistical test(s) used AND whether they are one- or two-sided<br><i>Only common tests should be described solely by name; describe more complex techniques in the Methods section.</i>                                                               |
| <input checked="" type="checkbox"/> | <input type="checkbox"/> A description of all covariates tested                                                                                                                                                                                                                                |
| <input type="checkbox"/>            | <input checked="" type="checkbox"/> A description of any assumptions or corrections, such as tests of normality and adjustment for multiple comparisons                                                                                                                                        |
| <input type="checkbox"/>            | <input checked="" type="checkbox"/> A full description of the statistical parameters including central tendency (e.g. means) or other basic estimates (e.g. regression coefficient) AND variation (e.g. standard deviation) or associated estimates of uncertainty (e.g. confidence intervals) |
| <input type="checkbox"/>            | <input checked="" type="checkbox"/> For null hypothesis testing, the test statistic (e.g. $F$ , $t$ , $r$ ) with confidence intervals, effect sizes, degrees of freedom and $P$ value noted<br><i>Give <math>P</math> values as exact values whenever suitable.</i>                            |
| <input checked="" type="checkbox"/> | <input type="checkbox"/> For Bayesian analysis, information on the choice of priors and Markov chain Monte Carlo settings                                                                                                                                                                      |
| <input checked="" type="checkbox"/> | <input type="checkbox"/> For hierarchical and complex designs, identification of the appropriate level for tests and full reporting of outcomes                                                                                                                                                |
| <input checked="" type="checkbox"/> | <input type="checkbox"/> Estimates of effect sizes (e.g. Cohen's $d$ , Pearson's $r$ ), indicating how they were calculated                                                                                                                                                                    |

Our web collection on [statistics for biologists](#) contains articles on many of the points above.

### Software and code

Policy information about [availability of computer code](#)

#### Data collection

Image acquisition: Zeiss ZEN  
Acquisition of sleep data through DAM system: DAMSystem3 software (TriKinetics, Inc.)  
Acquisition of FLIC data: embedded software within FLIC master controller

#### Data analysis

Statistical analyses: GraphPad PRISM  
Image analysis: NIH FIJI  
Analysis of sleep data: pySolo (published previously) and custom scripts in MATLAB (The MathWorks)  
Analysis of FLIC data: previously published R package, cited in paper

For manuscripts utilizing custom algorithms or software that are central to the research but not yet described in published literature, software must be made available to editors and reviewers. We strongly encourage code deposition in a community repository (e.g. GitHub). See the Nature Research [guidelines for submitting code & software](#) for further information.

### Data

Policy information about [availability of data](#)

All manuscripts must include a [data availability statement](#). This statement should provide the following information, where applicable:

- Accession codes, unique identifiers, or web links for publicly available datasets
- A list of figures that have associated raw data
- A description of any restrictions on data availability

No data has been deposited into third-party databases. All raw data is available from the authors upon reasonable request.

## Field-specific reporting

Please select the one below that is the best fit for your research. If you are not sure, read the appropriate sections before making your selection.

☒ Life sciences ☐ Behavioural & social sciences ☐ Ecological, evolutionary & environmental sciences

For a reference copy of the document with all sections, see [nature.com/documents/nr-reporting-summary-flat.pdf](https://www.nature.com/documents/nr-reporting-summary-flat.pdf)

## Life sciences study design

All studies must disclose on these points even when the disclosure is negative.

|                 |                                                                                                                                                                                                                                                                                                                  |
|-----------------|------------------------------------------------------------------------------------------------------------------------------------------------------------------------------------------------------------------------------------------------------------------------------------------------------------------|
| Sample size     | qPCR used 6-8 samples, each containing several tissues or animals, the standard in our lab; starvation and metabolic assays used 10-20 replicates containing multiple animals. Image analyses made use of multiple tissues per genotype or condition, as described in the appropriate figure legends or methods. |
| Data exclusions | No data are excluded                                                                                                                                                                                                                                                                                             |
| Replication     | Experimental results with RNAi were confirmed with CRISPR, eliminating almost all chance of off-target effects                                                                                                                                                                                                   |
| Randomization   | Animals were randomly grouped into batches as indicated in the text                                                                                                                                                                                                                                              |
| Blinding        | Researchers were not blinded during the study                                                                                                                                                                                                                                                                    |

## Reporting for specific materials, systems and methods

We require information from authors about some types of materials, experimental systems and methods used in many studies. Here, indicate whether each material, system or method listed is relevant to your study. If you are not sure if a list item applies to your research, read the appropriate section before selecting a response.

### Materials & experimental systems

| n/a                                 | Involved in the study                                           |
|-------------------------------------|-----------------------------------------------------------------|
| <input type="checkbox"/>            | <input checked="" type="checkbox"/> Antibodies                  |
| <input checked="" type="checkbox"/> | <input type="checkbox"/> Eukaryotic cell lines                  |
| <input checked="" type="checkbox"/> | <input type="checkbox"/> Palaeontology and archaeology          |
| <input type="checkbox"/>            | <input checked="" type="checkbox"/> Animals and other organisms |
| <input checked="" type="checkbox"/> | <input type="checkbox"/> Human research participants            |
| <input checked="" type="checkbox"/> | <input type="checkbox"/> Clinical data                          |
| <input checked="" type="checkbox"/> | <input type="checkbox"/> Dual use research of concern           |

### Methods

| n/a                                 | Involved in the study                           |
|-------------------------------------|-------------------------------------------------|
| <input checked="" type="checkbox"/> | <input type="checkbox"/> ChIP-seq               |
| <input checked="" type="checkbox"/> | <input type="checkbox"/> Flow cytometry         |
| <input checked="" type="checkbox"/> | <input type="checkbox"/> MRI-based neuroimaging |

## Antibodies

|                 |                                                                                                                                                                                                                                                                                                                                                                                                                                                                                                                                                                                                                                                                                                                                                                                                                                                                                                                                                                                       |
|-----------------|---------------------------------------------------------------------------------------------------------------------------------------------------------------------------------------------------------------------------------------------------------------------------------------------------------------------------------------------------------------------------------------------------------------------------------------------------------------------------------------------------------------------------------------------------------------------------------------------------------------------------------------------------------------------------------------------------------------------------------------------------------------------------------------------------------------------------------------------------------------------------------------------------------------------------------------------------------------------------------------|
| Antibodies used | <p>Academic antibodies:</p> <p>Rabbit anti-Akh was a gift of Jae Park, U. Tennessee;</p> <p>Mouse anti-Prospero #MR1A was obtained from University of Iowa Developmental Studies Hybridoma Bank);</p> <p>Rabbit anti-DILP2 was a gift of Ernst Hafen (ETH Zurich);</p> <p>Mouse anti-DILP3 and rabbit anti-AstC were gifts of Jan Veenstra, University of Bordeaux.</p> <p>Commercial antibodies:</p> <p>Rabbit anti-phospho-Akt: Cell Signaling Technology #4054;</p> <p>Rabbit anti-total-Akt: Cell Signaling Technology #4691;</p> <p>Mouse anti-histone H3: Abcam, #ab1791;</p> <p>Mouse anti-GFP, ThermoFisher #A11120;</p> <p>Alexa Fluor 488-conjugated goat anti-mouse, ThermoFisher #A32723;</p> <p>Alexa Fluor 488-conjugated goat anti-rabbit, ThermoFisher #A11008;</p> <p>Alexa Fluor 555-conjugated goat anti-mouse, ThermoFisher #A32732;</p> <p>IRDye800CW-conjugated anti-rabbit, LI-COR #925-32210;</p> <p>IRDye680RD-conjugated anti-mouse, LI-COR #925-68070.</p> |
| Validation      | <p>anti-Akh: Lee, G. &amp; Park, J. H. Hemolymph sugar homeostasis and starvation-induced hyperactivity affected by genetic manipulations of the adipokinetic hormone-encoding gene in <i>Drosophila melanogaster</i>. <i>Genetics</i> 167, 311-323, doi:10.1534/genetics.167.1.311 (2004).</p> <p>anti-AstC: Veenstra, J. A., Agricola, H. J. &amp; Sellami, A. Regulatory peptides in fruit fly midgut. <i>Cell Tissue Res</i> 334, 499-516, doi:10.1007/s00441-008-0708-3 (2008).</p>                                                                                                                                                                                                                                                                                                                                                                                                                                                                                              |

anti-DILP2: Bader, R. et al. The IGFBP7 homolog Imp-L2 promotes insulin signaling in distinct neurons of the Drosophila brain. J Cell Sci 126, 2571-2576, doi:10.1242/jcs.120261 (2013).

anti-DILP3: Veenstra, J. A., Agricola, H. J. & Sellami, A. Regulatory peptides in fruit fly midgut. Cell Tissue Res 334, 499-516, doi:10.1007/s00441-008-0708-3 (2008).

anti-Pros: Campbell, G. et al. RK2, a glial-specific homeodomain protein required for embryonic nerve cord condensation and viability in Drosophila. Development 120, 2957-2966 (1994).

Other antibodies are validated by their respective manufacturers.

## Animals and other organisms

Policy information about [studies involving animals](#): [ARRIVE guidelines](#) recommended for reporting animal research

|                         |                                                                    |
|-------------------------|--------------------------------------------------------------------|
| Laboratory animals      | Transgenic Drosophila melanogaster, non-invasive, non-pest species |
| Wild animals            | none                                                               |
| Field-collected samples | none                                                               |
| Ethics oversight        | none required                                                      |

Note that full information on the approval of the study protocol must also be provided in the manuscript.
